# Supplementary material for: Setting health research priorities using the CHNRI method: V. Quantitative properties of human collective knowledge
Source: PubMed Central journal article supplement (PMC4920010; doi:10.7189/jogh.06.010502), 2016-06

## Online Supplementary Document

Rudan et al. Setting health research priorities using the CHNRI method: V.  
Quantitative properties of human collective knowledge

JoGH 2016;6:010502

### SUPPLEMENTARY ONLINE MATERIAL

**Figure S1.** The association between the number of digits in the correct answer (x-axis) and the "error size" parameter (ratio, Y-axis) of a collective median answer in the exercise on medical Year 1 knowledge.

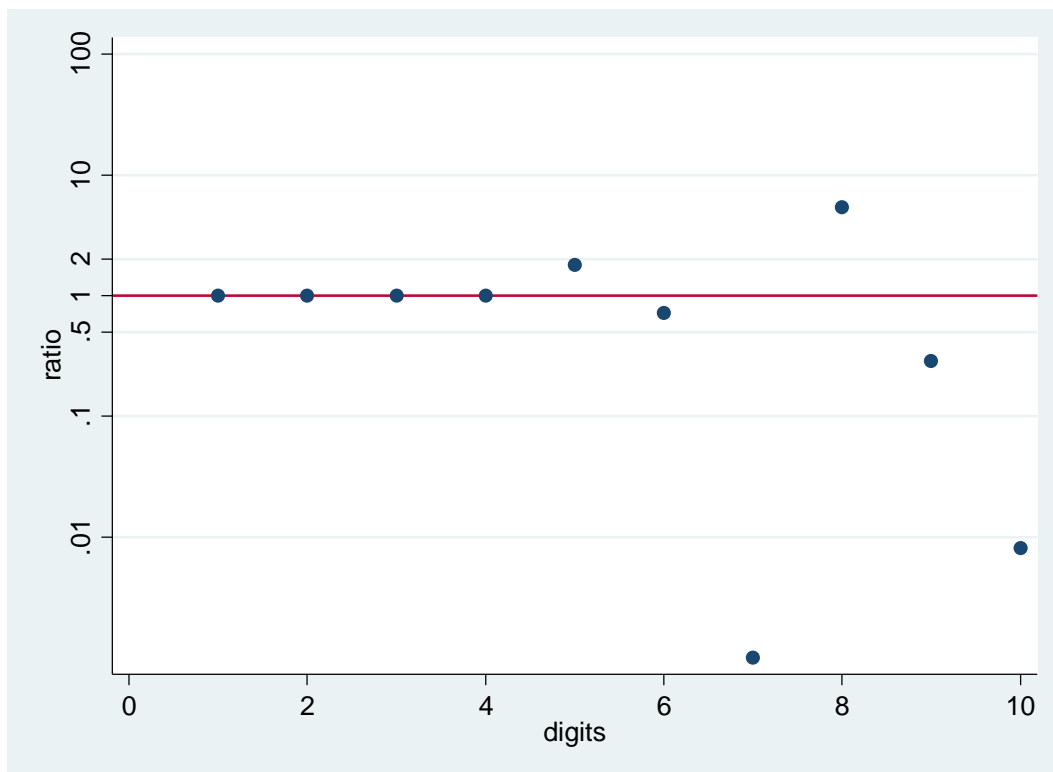

**Figure S2.** The association between the number of digits in the correct answer (x-axis) and the "error size" parameter (ratio, Y-axis) of a collective median answer in the exercise on general knowledge.

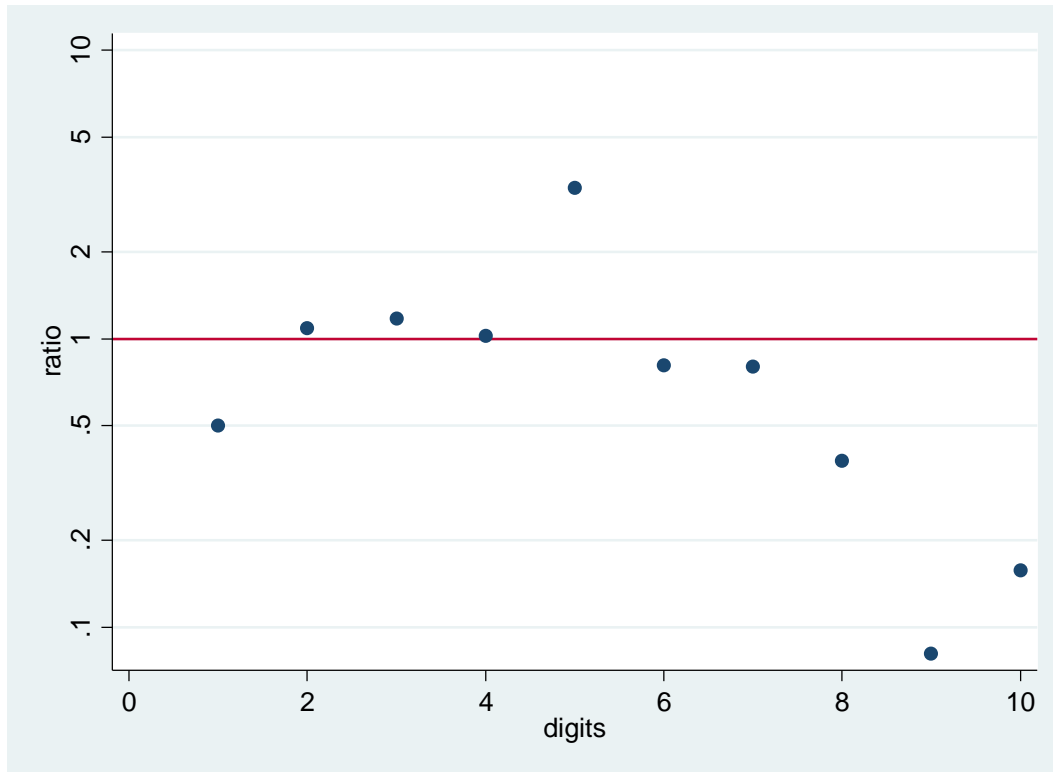

**Figure S3.** The association between the number of digits in the correct answer (x-axis) and the "error size" parameter (ratio, Y-axis) of a collective median answer in the exercise on astronomy knowledge.

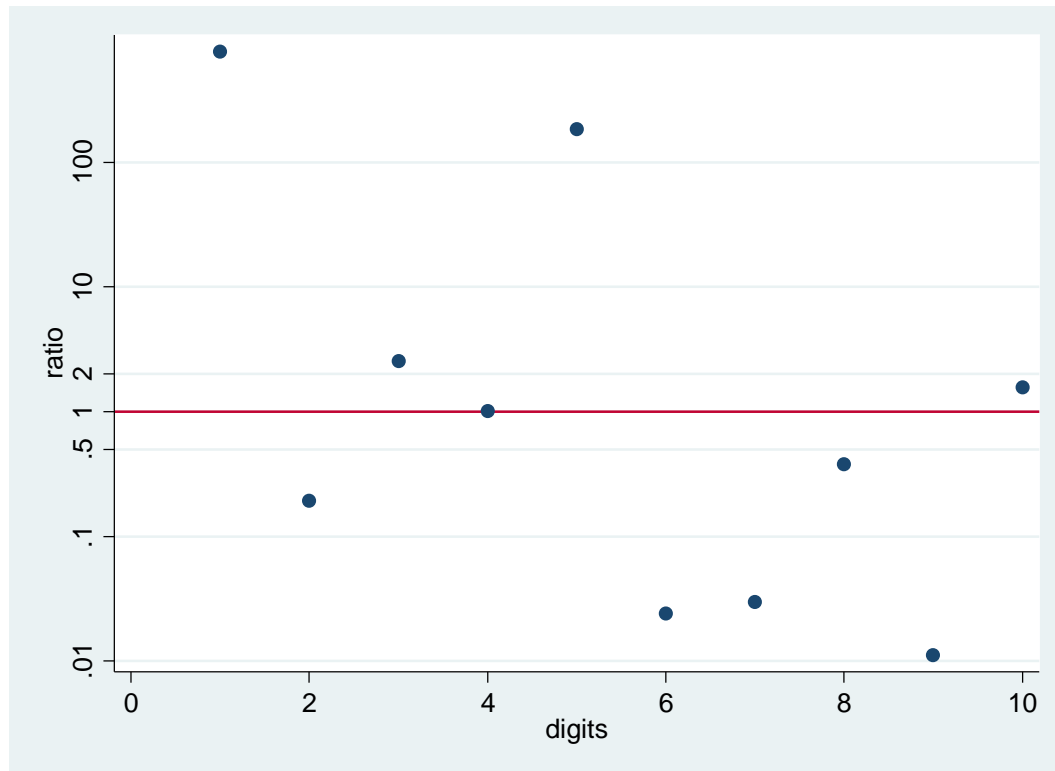

**Figure S4:** The association between the actual age difference (in years, x-axis) and percentage of positive answers in the exercise of guessing the older celebrity in a pair of celebrities.

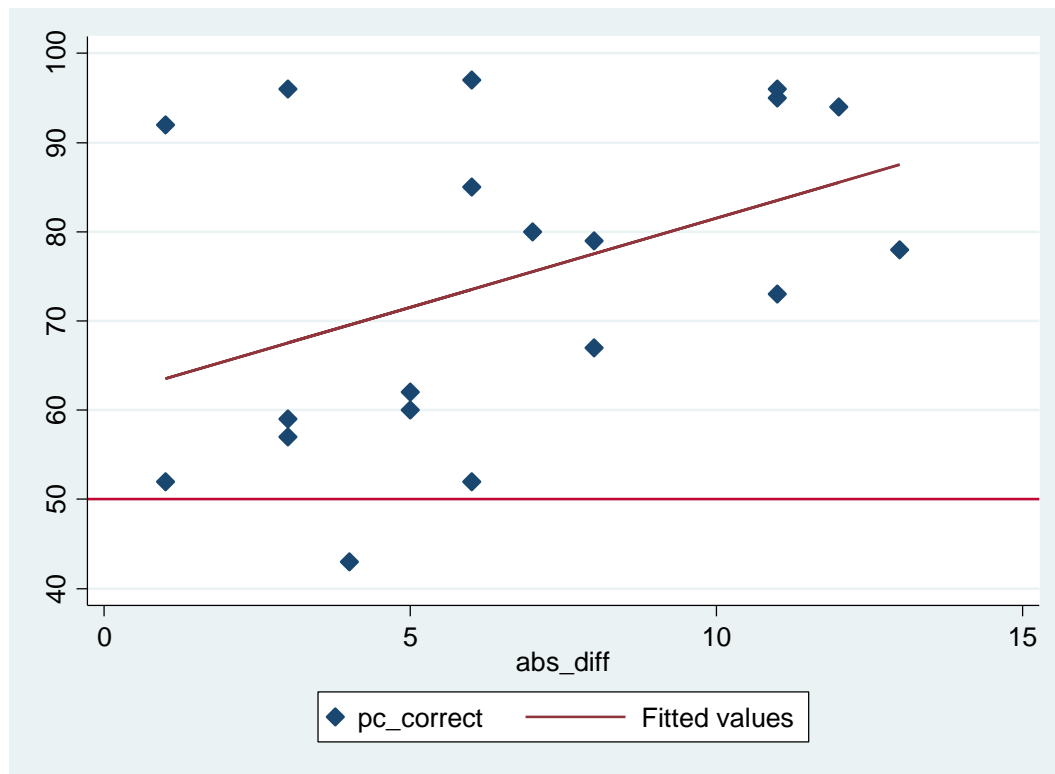

Supplement: jogh-06-010502-s001.pdf [file jogh-06-010502-s001.pdf]
